# Supplementary material
Source: PubMed Central journal article supplement (PMC7773350)
Supplement: jci-131-142246-s608.pdf [file jci-131-142246-s608.pdf]

**Supplemental Table 1. Clinical Features Distinguishing Nutritional Ketosis from Ketoacidosis**

| <i>Feature</i>               | <b>Nutritional Ketosis</b>   | <b>Ketoacidosis</b>         |
|------------------------------|------------------------------|-----------------------------|
| Clinical state               | Physiological                | Pathological                |
| Serum insulin                | Low to moderate (Sufficient) | Absent/very low (Deficient) |
| Blood glucose                | < 120 mg/dL                  | > 250 mg/dL <sup>1</sup>    |
| Blood ketones (βOHB)         | 0.5-5.0 mM                   | > 3- 5 mM <sup>2</sup>      |
| Urine ketones (acetoacetate) | Variable <sup>3</sup>        | Present                     |
| Ketone production            | Regulated                    | Unregulated                 |
| Venous pH                    | > 7.3 <sup>4</sup>           | ≤ 7.3                       |
| Serum bicarbonate            | > 18mEq/L <sup>4</sup>       | ≤ 15-18mEq/L                |

<sup>1</sup> “Euglycemic” ketoacidosis (BG < 250 mg/dL) may occur in patients with T1D (in various states associated with starvation) and in T2D, and is more common in those taking SGLT2 inhibitors.

<sup>2</sup> βOHB concentration of ≥ 5.3 mM in children with hyperglycemia (on a conventional diet) provides optimal accuracy for predicting ketoacidosis (1).

<sup>3</sup> With adaptation to nutritional ketosis, urinary excretion of ketone bodies decreases.

<sup>4</sup> See Gomez-Arbelaez et al., Sheikh-Ali et al., and Dhatariya et al. (2-4).

Abbreviations: βOHB, β-hydroxybutyrate

**Supplemental Table 2: A Research Agenda to Study Carbohydrate Restriction for the Treatment of Diabetes.** Key scientific questions listed according to study type, with potential characteristic design aspects noted.

| STUDY TYPE                                                                                                                                                                                                                                                                                                                                                                                                                                                                                                                                                                                                                                                                                                                                            | Duration       | Focus of Validity <sup>1</sup> | Setting                        | Participant number |
|-------------------------------------------------------------------------------------------------------------------------------------------------------------------------------------------------------------------------------------------------------------------------------------------------------------------------------------------------------------------------------------------------------------------------------------------------------------------------------------------------------------------------------------------------------------------------------------------------------------------------------------------------------------------------------------------------------------------------------------------------------|----------------|--------------------------------|--------------------------------|--------------------|
| <i>Mechanistic</i>                                                                                                                                                                                                                                                                                                                                                                                                                                                                                                                                                                                                                                                                                                                                    | Days to weeks  | Internal                       | Metabolic ward                 | 10 to 20           |
| <ul style="list-style-type: none"> <li>• What insulin regimen(s) provide(s) the best balance of glycemic control and safety with a VLC diet for T1D?</li> <li>• Does the presence of ketones on a VLC diet protect against symptomatic hypoglycemia?</li> <li>• Do ketones modulate pathophysiological processes (e.g., related to chronic inflammation, oxidative stress) of relevance to diabetic complications?</li> <li>• How do VLC diets with normal (15 - 20%) vs high (<math>\geq 25\%</math>) protein content affect glycemic control, metabolic and safety parameters?</li> </ul>                                                                                                                                                           |                |                                |                                |                    |
| <i>Efficacy</i>                                                                                                                                                                                                                                                                                                                                                                                                                                                                                                                                                                                                                                                                                                                                       | 3 to 12 months | Internal                       | Outpatient with food provision | 50 to 200          |
| <ul style="list-style-type: none"> <li>• Does a VLC improve measures of glycemic control in T1D and T2D?</li> <li>• Does a VLC diet improve adiposity, insulin resistance and other components of the metabolic syndrome?</li> <li>• How do VLC diets affect risk for symptomatic hypoglycemia and diabetic ketoacidosis in T1D?</li> <li>• How do VLC diets affect LDL cholesterol and small-dense LDL particles?</li> <li>• Do VLC diets adversely affect growth and/or pubertal development in children with T1D?</li> <li>• Do VLC diets increase risk for other clinically important adverse events in T1D or T2D?</li> <li>• Does a MC or LC diet, with a simultaneous focus on reducing GI, produce similar benefits to a VLC diet?</li> </ul> |                |                                |                                |                    |
| <i>Behavioral aspects</i>                                                                                                                                                                                                                                                                                                                                                                                                                                                                                                                                                                                                                                                                                                                             | Various        | Internal / External            | Various                        | Various            |
| <ul style="list-style-type: none"> <li>• How do CR diets affect hunger, satiety and eating behavior?</li> <li>• Which behavioral methods will enhance long-term adherence to a CR diet?</li> <li>• Which environmental interventions will enhance long-term adherence to a CR diet?</li> <li>• How do CR diets affect quality of life and well-being?</li> <li>• What are the financial costs of a VLC diet (e.g., potentially increased for food, decreased for insulin)?</li> </ul>                                                                                                                                                                                                                                                                 |                |                                |                                |                    |
| <i>Effectiveness (Surrogate outcomes)</i>                                                                                                                                                                                                                                                                                                                                                                                                                                                                                                                                                                                                                                                                                                             | 1 to 2 years   | External                       | Outpatient                     | 100 to 500         |
| <ul style="list-style-type: none"> <li>• How do CR vs conventional diabetes diets affect glycemic control over the long-term for T1D and T2D?</li> <li>• How do CR vs conventional diabetes diets affect CVD risk factors over the long-term for T1D and T2D?</li> <li>• Do certain patients respond especially well to a CR diet? And if so, can they be identified in advance?</li> </ul>                                                                                                                                                                                                                                                                                                                                                           |                |                                |                                |                    |
| <i>Effectiveness (Clinical outcomes)</i>                                                                                                                                                                                                                                                                                                                                                                                                                                                                                                                                                                                                                                                                                                              | $\geq 2$ years | External                       | Outpatient                     | $\geq 500$         |
| <ul style="list-style-type: none"> <li>• Do CR vs conventional diabetes diets prevent microvascular disease in T1D and T2D?</li> <li>• Do CR vs conventional diabetes diets prevent CVD, kidney disease or limb amputation in T1D and T2D?</li> <li>• Do CR vs conventional diabetes diets prevent premature mortality in T1D and T2D?</li> <li>• Does a CR diet prevent T2D in individuals at risk?</li> <li>• Does a CR diet reduce direct medical and total (including lost productivity) costs associated with diabetes?</li> <li>• Does CR from time of diagnosis extend honeymoon period in T1D?</li> </ul>                                                                                                                                     |                |                                |                                |                    |

Abbreviations: CR; carbohydrate-restricted; CVD, cardiovascular disease; GI, glycemic index; LC, low carbohydrate (10-25% energy intake); MC, moderate carbohydrate (26-45% energy intake); T1D, type 1 diabetes; T2D, type 2 diabetes; VLC, very-low-carbohydrate (<10% energy intake)

<sup>1</sup> Internal validity (experimental control over intervention) vs external validity (practicality and generalizability)

## Supplemental References

1. Tremblay ES, Millington K, Monuteaux MC, Bachur RG, and Wolfsdorf JI. Plasma beta-Hydroxybutyrate for the Diagnosis of Diabetic Ketoacidosis in the Emergency Department. *Pediatr Emerg Care*. 2020.
2. Dhatariya KK, Glaser NS, Codner E, and Umpierrez GE. Diabetic ketoacidosis. *Nat Rev Dis Primers*. 2020;6(1):40.
3. Gomez-Arbelaez D, Crujeiras AB, Castro AI, Goday A, Mas-Lorenzo A, Bellon A, et al. Acid-base safety during the course of a very low-calorie-ketogenic diet. *Endocrine*. 2017;58(1):81-90.
4. Sheikh-Ali M, Karon BS, Basu A, Kudva YC, Muller LA, Xu J, et al. Can serum beta-hydroxybutyrate be used to diagnose diabetic ketoacidosis? *Diabetes Care*. 2008;31(4):643-7.
